# Supplementary material for: The Prevalence of Clinical Features in Patients with Aarskog–Scott Syndrome and Assessment of Genotype-Phenotype Correlation: A Systematic Review
Source: Hindawi journal article supplement (doi:10.1155/2021/6652957), 2021-02-02
Supplement: f1 [file 6652957.f1.pdf]

**Genetics Research. The prevalence of clinical features in patients with Aarsk**

Victor Zanetti Drumond, Lucas Sousa Salgado, Camila Sousa Salgado, Vitor Augu

**Supplementary Table S1: L**

| Authors                | Year | Country | Patient | Age(years) | Phenotypes                                                                                                                                                                                                                                                                   |
|------------------------|------|---------|---------|------------|------------------------------------------------------------------------------------------------------------------------------------------------------------------------------------------------------------------------------------------------------------------------------|
| Schwartz et al.<br>[3] | 2000 | USA§    | 1(FC)   | 7          | Brachydactyly/wide fingers; Cupid's Bow; Dorsal Groove penis; Downward Slant Palpebral Fissures; Hypertelorism ; Interphalangeal Joint Contracture; Joint Hypermobility; Long Philtrum; Macrocephaly; Pointed Chin.; Ptosis; Short Stature; Simian Creases; Umbilical Hernia |
|                        |      |         | 2(IT)   | 12         | Brachydactyly/wide fingers; Cupid's Bow; Downward Slanted Palpebral Fissures; Hypertelorism; Inguinal Hernia; Interphalangeal Joint Contracture; Joint hypermobility; Long Philtrum; Macrocephaly; Pointed Chin; Ptosis; Shawl Scrotum; Short Stature; Simian Crease         |
|                        |      |         | 3(MK)   | 11         | Anteverted Nostrils; Brachydactyly/Wide Fingers; Hypertelorism; Shawl Scrotum; Short Stature; Syndactyly; Cryptorchidism; Downward slant palpebral fissures; Inguinal hernia; Ptosis; Widow's peak; Bone Age retarded; Myopia                                                |

|                    |      |       |         |    |                                                                                                                                                                                                                                                                                                                                                                                                                                                  |
|--------------------|------|-------|---------|----|--------------------------------------------------------------------------------------------------------------------------------------------------------------------------------------------------------------------------------------------------------------------------------------------------------------------------------------------------------------------------------------------------------------------------------------------------|
| Orrico et al. [37] | 2000 | Italy | 4(II1)  | 66 | Anteverted Nostrils;<br>Camptodactyly; Clinodactyly;<br>Crease Below Lower Lip;<br>Cryptorchidism; Downward<br>Slanted Palpebral Fissures;<br>Hypertelorism; Inguinal<br>Hernia; Interdigital Webbing;<br>Ptosis; Scrotum; Short<br>Stature; Short/Broad Hands;<br>Umbilical Hernia; Widow's Peak                                                                                                                                                |
|                    |      |       | 5(IV9)  | 9  | Anteverted Nostrils; Anteverted<br>nostrils/Short Nose;<br>Clinodactyly; Crease Below<br>Lower Lip; Cryptorchidism;<br>Downward Slant Palpebral<br>Fissures; Dysplastic Ears;<br>Frontal Bossing; Hypertelorism;<br>Inguinal Hernia; Interdigital<br>Webbing; Joint Hypermobility;<br>Long Philtrum; Midface<br>Hypoplasia; Ptosis; Round<br>Face; Scrotum; Short<br>Stature; Short/Broad Hands;<br>Umbilical Hernia; Wide feet;<br>Widow's peak |
|                    |      |       | 6(IV10) | 19 | Anteverted Nostrils; Anteverted<br>nostrils/Short Nose;<br>Clinodactyly; Crease Below<br>Lower Lip; Cryptorchidism;<br>Downward Slant Palpebral<br>Fissures; Hypertelorism;<br>Inguinal Hernia; Interdigital<br>Webbing; Joint Hypermobility;<br>Ptosis; Scrotum; Short<br>Stature; Short/Broad Hands;<br>Umbilical Hernia; Widow's Peak                                                                                                         |

|  |  |          |       |    |                                                                                                                                                                                                                                                                                                                                              |
|--|--|----------|-------|----|----------------------------------------------------------------------------------------------------------------------------------------------------------------------------------------------------------------------------------------------------------------------------------------------------------------------------------------------|
|  |  | NR*      | 7(50) | 29 | Anteverted Nostrils; Anteverted nostrils/Short Nose; Brachydactyly/Wide Fingers; Camptodactyly; Clinodactyly; Cryptorchidism; Hydrocele; Hypertelorism; Inguinal Hernia; Joint Hypermobility; Long Philtrum; Oligoasthenozoospermia; Ptosis; Shawl Scrotum; Short Stature; Syndactyly                                                        |
|  |  | NR*      | 8(90) | 9  | Anteverted Nostrils; Brachydactyly/Wide Fingers; Camptodactyly; Cryptorchidism; Downward Slant Palpebral Fissures; Dysplastic Ears; Frontal Bossing; Hypertelorism; Inguinal Hernia; Interdigital Webbing; Joint Hypermobility; Long Philtrum; Ptosis; Round Face; Shawl Scrotum; Short Stature; Short/Broad Hands; Syndactyly; Widow's Peak |
|  |  | Portugal | 9(25) | 11 | Anteverted Nostrils; Brachydactyly/Wide Fingers; Camptodactyly; Cryptorchidism; Downward Slant Palpebral Fissures; Dysplastic Ears; Frontal Bossing; Hypertelorism; Inguinal Hernia; Interdigital Webbing; Joint Hypermobility; Long Philtrum; Ptosis; Round Face; Shawl Scrotum; Short Stature; Short/Broad Hands; Syndactyly; Widow's Peak |

|                   |      |     |        |     |                                                                                                                                                                                                                                                                                                      |
|-------------------|------|-----|--------|-----|------------------------------------------------------------------------------------------------------------------------------------------------------------------------------------------------------------------------------------------------------------------------------------------------------|
| Orrico et al. [6] | 2004 | NR* | 10(53) | 1.3 | Anteverted nostrils/Short Nose; Brachydactyly/wide fingers; Clinodactyly; Cryptorchidism; Downward slant palpebral fissures; Hypertelorism; Inguinal hernia ; Joint hypermobility; Long Philtrum;Shawl Scrotum ;Short stature; Simian Crease; Syndactyly; Umbilical hernia; Widow's peak             |
|                   |      | NR* | 11(61) | 21  | Behavioral Disorders;Brachydactyly/wide fingers; Camptodactyly; Hypertelorism; Joint hypermobility;Ptosis; Shawl Scrotum; short neck; Short stature; Social/Language skills delayed; Strabismus; Syndactyly                                                                                          |
|                   |      | NR* | 12(26) | 3   | Anteverted nostrils/Short Nose;Anteverted nostrils/Short Nose; Brachydactyly/wide fingers; Clinodactyly; Epicanthal fold; Hypertelorism ; Inguinal hernia; Joint hypermobility; Long philtrum; Metatarsus varus; Round face; Shawl Scrotum; Short stature;Syndactyly; Umbilical hernia; Widow's peak |
|                   |      | NR* | 13(73) | 4.5 | Anteverted nostrils/Short Nose; Bone age retarded; Camptodactyly; Cleft Lip Palate; Downward slant palpebral fissures; Epicanthal fold; Hypertelorism; Inguinal Hernia; Joint Hypermobility; Long Philtrum; Low set ears; Ptosis; Shawl Scrotum; Syndactyly; Widow's peak                            |

|                          |      |         |        |     |                                                                                                                                                                                                                                                                                                                                                                                                                                                       |
|--------------------------|------|---------|--------|-----|-------------------------------------------------------------------------------------------------------------------------------------------------------------------------------------------------------------------------------------------------------------------------------------------------------------------------------------------------------------------------------------------------------------------------------------------------------|
|                          |      | NR*     | 14(58) | 1.6 | ADHD; Anteverted nostrils/Short Nose; Axial Hypotonia; Brachydactyly/Wide fingers; Cryptorchidism; Development delayed; Hypertelorism; Joint Hypermobility; Long Philtrum; Low set ears; Prominent umbilicus; Ptosis; Shawl Scrotum; Short Stature; Syndactyly                                                                                                                                                                                        |
|                          |      | Ireland | 15(65) | 16  | Anteverted nostrils/Short Nose; Brachydactyly/Wide Fingers; Camptodactyly; Cryptorchidism; Downward slant palpebral fissures; Hypertelorism; Long philtrum; Ptosis; Shawl Scrotum; Short/Broad Hands; Syndactyly; Wide feet                                                                                                                                                                                                                           |
|                          |      |         |        |     |                                                                                                                                                                                                                                                                                                                                                                                                                                                       |
| <b>Orrico et al. [7]</b> | 2005 | Italy   | 16     | 16  | ADHD; Axial hypotonia; Behavioral disorder; Borderline mental retardation; Brachydactyly/Wide fingers; Broad NA†sal bridge; Downward slant palpebral fissures; Dysplastic ears; Enlarged Virchow-Robin spaces; HyperNA†sal speech; Hypertelorism; Interdigital webbing; Joint hypermobility; Low set ears; MicrogNA†thia; Midface Hypoplasia; Ogival palate; Pectus excavatum; Prominent umbilicus; ptosis; Short stature; Simian Creases; Strabismus |
|                          |      |         |        |     |                                                                                                                                                                                                                                                                                                                                                                                                                                                       |

|                    |      |        |         |    |                                                                                                                                                                                                                                                          |
|--------------------|------|--------|---------|----|----------------------------------------------------------------------------------------------------------------------------------------------------------------------------------------------------------------------------------------------------------|
| Shalev et al. [24] | 2006 | Israel | 17(IV2) | 24 | Anteverted nostrils/Short Nose; Brachydactyly/Wide fingers; Camptodactyly; Dysplastic ears; Hypertelorism; Long philtrum; Pectus carinatum; Ptosis; Round face; Shawl Scrotum Short stature; Simian creases; Syndactyly                                  |
|                    |      |        | 18(IV3) | 16 | Brachydactyly/wide finger; Camptodactyly; Dysplastic ears; Frontal bossing; Hypertelorism; Ptosis; Round face; Short Stature; Simian creases; Syndactyly                                                                                                 |
|                    |      |        | 19(IV4) | 2  | Anteverted nostrils/Short Nose; Behavioral disorder; Development delayed; Fine and gross motor skills delayed; Hypertelorism; Microcephaly, Neurocognitive development delayed; Ptosis; Seizures; Short stature; Social/Language Skills delayed; Vertigo |
| KaNAjme et al. [8] | 2006 | Japan  | 20(1)   | 13 | ADHD;Brachydactyly/Wide fingers; Frontal bossing; Hypertelorism; Interdigital webbing; Interphalangeal joint contracture; Joint hypermobility; Ptosis; Shawl scrotum; Short stature; Short/Broad Hands; Wide feet                                        |
|                    |      |        | 21(2)   | 4  | Brachydactyly/Wide fingers; Frontal Bossing; Hypertelorism; Interdigital Webbing; Interphalangeal joint contracture; Joint hypermobility; Shawl Scrotum; Short stature; Short/Broad Hands; wide feet                                                     |

|                            |      |             |    |    |                                                                                                                                                                                                                                                                                                                                                                                                                                                                                                                                                                                                                                                                                 |
|----------------------------|------|-------------|----|----|---------------------------------------------------------------------------------------------------------------------------------------------------------------------------------------------------------------------------------------------------------------------------------------------------------------------------------------------------------------------------------------------------------------------------------------------------------------------------------------------------------------------------------------------------------------------------------------------------------------------------------------------------------------------------------|
| <b>Bottani et al. [25]</b> | 2007 | Switzerland | 22 | 8  | Clinodactyly; Clubbed feet; Cryptorchidism; Inguinal hernia; Joint hypermobility; Pectus excavatum; Seizures; Shawl Scrotum; Unilateral focal frontoparietal PMG, Migraine headaches                                                                                                                                                                                                                                                                                                                                                                                                                                                                                            |
|                            |      |             |    |    |                                                                                                                                                                                                                                                                                                                                                                                                                                                                                                                                                                                                                                                                                 |
| <b>Orrico et al. [26]</b>  | 2007 | Italy       | 23 | 15 | Agenesis of Corpus Callosum; Anteverted nostrils/Short Nose; Brachydactyly/wide fingers; Crease below lower lip; Downward slant palpebral fissures; Dysplastic ears; Fine and gross motor skills delayed; Hydrocele; Hypertelorism; Inguinal hernia; Interdigital webbing; Long philtrum; Midface Hypoplasia; Neurocognitive development delayed; Omphalocele; Parietal-occipital encephalocele; Pectus excavatum; Ptosis; Right hemifacial microsomia; Shawl Scrotum; Short neck; Short stature; Short/Broad Hands; Simian Creases; still's murmur; Submucous cleft palate; Synophry; Transethmoidal; Meningoencephalocele; Ventricular septal defect; Wide feet; Widow's Peak |
|                            |      |             | 24 | 6  | Anteverted nostrils/Short Nose; Bifid uvula; Brachydactyly/Wide fingers; Camptodactyly; Crease below lower lip; Inguinal hernia; Interdigital webbing; Long philtrum; Low set ears; Metatarsus varus; Pectus excavatum; Prominent umbilicus; Ptosis; Round face; Shawl Scrotum; Short neck; Short stature; Simian Creases; Synophrys; Telecanthus; Widow's peak                                                                                                                                                                                                                                                                                                                 |

|                                       |             |             |              |             |                                                                                                                                                                                                                                                                                                                                              |
|---------------------------------------|-------------|-------------|--------------|-------------|----------------------------------------------------------------------------------------------------------------------------------------------------------------------------------------------------------------------------------------------------------------------------------------------------------------------------------------------|
| <p><b>Bedoyan et al.<br/>[27]</b></p> | <p>2009</p> | <p>USAŞ</p> | <p>25</p>    | <p>1.25</p> | <p>Anteverted nostrils/Short Nose;<br/>Astigmatism; Camptodactyly;<br/>Cryptorchidism; Downward<br/>slant palpebral fissures;<br/>Dysplastic ears; Hypertelorism;<br/>Inguinal hernia; Ogival palate;<br/>Ptosis; Shawl Scrotum</p>                                                                                                          |
|                                       |             | <p>NR*</p>  | <p>26(9)</p> | <p>NR*</p>  | <p>Anteverted nostrils;<br/>Brachydactyly/Wide fingers;<br/>Clinodactyly; Cryptorchidism;<br/>Dental malocclusion; Dysplastic<br/>ears; Hypertelorism; long<br/>philtrum; Midface hypoplasia;<br/>Obesity; Shawl scrotum; Short<br/>stature; Short/Broad Hands;<br/>Wide feet</p>                                                            |
|                                       |             | <p>NR*</p>  | <p>27(2)</p> | <p>NR*</p>  | <p>Anteverted nostrils/Short Nose;<br/>Bone age retarded;<br/>Development delayed;<br/>Dysplastic ears; Hypertelorism;<br/>Obesity; preauricular tag; Shawl<br/>scrotum; Short stature;<br/>Short/Short/Broad Hands;<br/>Simian creases; Widow's peak</p>                                                                                    |
|                                       |             | <p>NR*</p>  | <p>28(5)</p> | <p>NR*</p>  | <p>Anteverted nostrils/Short<br/>Nose; Camptodactyly;<br/>Cryptorchidism; Development<br/>delayed; Hypertelorism;<br/>Inguinal hernia; Interdigital<br/>webbing; Long philtrum;<br/>Metatarsus varus; Ptosis;<br/>Shawl scrotum; Short stature;<br/>Short/Broad Hands; Simian<br/>creases; Umbilical hernia; Wide<br/>feet; Widow's peak</p> |



Orrico et al. [16]

2010

|     |        |     |                                                                                                                                                                                                                                                                                                                                                                                                |
|-----|--------|-----|------------------------------------------------------------------------------------------------------------------------------------------------------------------------------------------------------------------------------------------------------------------------------------------------------------------------------------------------------------------------------------------------|
| NR* | 29(10) | NR* | Anteverted nostrils/Short Nose;<br>Brachydactyly/wide fingers;<br>Camptodactyly; Clinodactyly;<br>Crease below lower lip;<br>Downward slant palpebral<br>fissures; Fetal Nuchal Oedema;<br>Frontal bossing; Hypertelorism;<br>Interdigital webbing; Long<br>philtrum; Metatarsus varus;<br>Microcephaly; Ptosis; Short<br>stature; Short/Broad Hands;<br>Simian creases; Wide feet             |
| NR* | 30(3)  | NR* | Anteverted nostrils/Short Nose;<br>Brachycephaly;<br>Brachydactyly/wide fingers;<br>Clinodactyly; Crease below<br>lower lip; Development<br>delayed; Dysplastic ears;<br>Hypertelorism; Hypospadias;<br>Inguinal hernia; Long<br>Philtrum; Micropenis; Midface<br>hypoplasia; Obesity; Ptosis;<br>Shawl scrotum, Short stature;<br>Short/Short/Broad Hands;<br>Umbilical hernia; Widow's peak  |
| NR* | 31(11) | NR* | Anteverted nostrils/Short Nose;<br>bone age retarded;<br>Brachydactyly/Wide fingers;<br>Clinodactyly; crease below<br>lower lip; downward slant<br>palpebral fissures; frontal<br>bossing; Hypertelorism; long<br>philtrum; midface hypoplasia;<br>Patent ductus arteriosus;<br>prominent umbilicus; ptosis;<br>shawl scrotum; Short<br>Stature; Short/Broad Hands;<br>wide feet; widow's peak |
| NR* | 32(8)  | NR* | Anteverted nostrils/Short<br>Nose; Anteverted nostrils/Short<br>Nose; Brachydactyly/wide<br>fingers; Camptodactyly;<br>Clinodactyly; Cryptorchidism;<br>Hypertelorism; long philtrum;<br>obesity; Shawl scrotum; Short<br>stature; Short/Broad Hands;<br>Wide feet                                                                                                                             |

|  |  |     |       |     |                                                                                                                                                                                                                                                                                                                                                                  |
|--|--|-----|-------|-----|------------------------------------------------------------------------------------------------------------------------------------------------------------------------------------------------------------------------------------------------------------------------------------------------------------------------------------------------------------------|
|  |  | NR* | 33(6) | NR* | Anteverted nostrils/Short Nose; bone age retarded; Brachydactyly/Wide fingers; Camptodactyly; clinodactyly; crease below lower lip; cryptorchidism; downward slant palpebral fissures; dysplastic ears; hypertelorism; joint hypermobility; shawl scrotum; Short stature; Short/Broad Hands; simian creases; Strabismus; wide feet; widow's peak                 |
|  |  | NR* | 34(7) | NR* | Anteverted nostrils/Short Nose; Brachydactyly/wide fingers; Clinodactyly; Congenital glaucoma; crease below lower lip; cryptorchidism; Dysplastic ears; frontal bossing; hypertelorism; Interdigital webbing; Joint hypermobility; long philtrum; metatarsus varus; midface hypoplasia; Shawl scrotum; short stature; Short/Broad Hands; Wide feet; Widow's peak |
|  |  | NR* | 35(1) | NR* | Anteverted nostrils/Short Nose; Anteverted nostrils/Short Nose; bone age retarded; crease below lower lip; downward slant palpebral fissures; dysplastic ears; Exostosis; hypertelorism; large eyebrows; long philtrum; pectus excavatum; shawl scrotum; short stature; Short/Broad Hands; wide feet; widow's peak                                               |
|  |  | NR* | 36(4) | NR* | Anteverted nostrils/Short Nose; Brachydactyly/wide fingers; camptodactyly; clinodactyly; clubbed feet; Cryptorchidism; development delayed; Frontal bossing; hypertelorism; interdigital webbing; Shawl Scrotum; Short stature; Short/Broad Hands; Widow's peak                                                                                                  |

|                              |      |        |           |      |                                                                                                                                                                                                                                                                                                                                                                                                       |
|------------------------------|------|--------|-----------|------|-------------------------------------------------------------------------------------------------------------------------------------------------------------------------------------------------------------------------------------------------------------------------------------------------------------------------------------------------------------------------------------------------------|
| Pillozzi-Edmonds et al. [28] | 2011 | Canada | 37(1)     | 0.75 | Axial hypotonia; bitemporal narrowing; Clinodactyly; clubbed feet; frontal bossing; hydronephrosis; hypertelorism; inguinal hernia; interphalangeal joint contractures; low set ears; preauricular tag; Shawl scrotum; simian creases; vesicoureteral reflux                                                                                                                                          |
|                              |      |        | 38(2)     | 0.75 | Anteverted nostrils/Short Nose; Axial Hypotonia; broad nasal bridge; clinodactyly; clubbed feet; cryptorchidism; frontal bossing; hypertelorism; interphalangeal joint contracture; long philtrum; low set ears; myopia; preauricular tag; Shawl Scrotum. Inguinal Hernia; Simian Creases; thin upper lip vermilion; triangular downturned mouth; upslanted palpebral fissures; vesicoureteral reflux |
| Ronce et al. [29]            | 2012 | France | 39        | NR*  | Anteverted nostrils/Short Nose; arthrogryposis; Camptodactyly; cryptorchidism; dysplastic ears; hypertelorism; joint hypermobility; large fontanelle/sutures; long philtrum; low set ears; metatarsus varus; micropenis; midface hypoplasia; Retrognathia; round face; short neck; Short/Broad Hands; simian creases; wide feet; widow's peak                                                         |
|                              |      |        | 40(III-1) | NR*  | Anteverted nostrils/Short Nose; cleft lip palate; cow's lick; cryptorchidism; dysplastic ears; Hypertelorism; interphalangeal joint contracture; joint hypermobility; long philtrum; shawl scrotum; short stature; Short/Broad Hands; wide feet                                                                                                                                                       |

|                             |      |             |            |     |                                                                                                                                                                                                                                                                                                                                              |
|-----------------------------|------|-------------|------------|-----|----------------------------------------------------------------------------------------------------------------------------------------------------------------------------------------------------------------------------------------------------------------------------------------------------------------------------------------------|
| <b>Aten et al. [30]</b>     | 2012 | Netherlands | 41 (III-2) | NR* | Anteverted nostrils/Short Nose; cow's lick; cryptorchidism; dysplastic ears;Hypertelorism; joint hypermobility; long philtrum; shawl scrotum; short stature; Short/Broad Hands; widow's peak                                                                                                                                                 |
|                             |      |             | 42 (I-1)   | NR* | Cow's lick;Hypertelorism; Interphalangeal joint contractures; long philtrum; Short Stature; Widow's peak                                                                                                                                                                                                                                     |
| <b>Altıncık et al. [31]</b> | 2013 | Turkey      | 43         | 7   | Amblyopia; astigmatism; borderline mental retardation;Brachydactyly/wide fingers; broad NA†sal bridge; cryptorchidism; Frontal bossing; Hypertelorism; interdigital webbing; long philtrum; short stature; Short/Broad Hands                                                                                                                 |
| <b>Völter et al. [32]</b>   | 2014 | Germany     | 44         | 9   | ADHD; Broad NA†sal bridge; cleft lip palate;Clinodactyly; hemianopsia; hyperNA†sal speech; hypertelorism; interdigital webbing; long philtrum; low set ears; metatarsus varus; microcephaly; Midface hypoplasia; NA†sal ectopic teeth; ptosis; round face; short neck; Short stature; Short/Broad Hands; telecanthus; Von Willebrand disease |
|                             |      |             | 45(Index)  | 16  | Anteverted nostrils/Short Nose; Anteverted nostrils/Short Nose; hypertelorism; joint hypermobility; metatarsus varus; MicrogNA†thia; Myopathy; ogival palate; ptosis; shawl scrotum; short stature                                                                                                                                           |

|                              |      |              |            |    |                                                                                                                                                                                                            |
|------------------------------|------|--------------|------------|----|------------------------------------------------------------------------------------------------------------------------------------------------------------------------------------------------------------|
| <b>Al-Semari et al. [19]</b> | 2013 | Saudi Arabia | 46(Bro1  ) | 14 | Anteverted nostrils/Short Nose; Anteverted nostrils/Short Nose; hypertelorism; joint hypermobility; metatarsus varus; microgNA†thia; ogival palate; pectus excavatum; shawl scrotum; short stature         |
|                              |      |              | 47(Bro2  ) | 21 | Anteverted nostrils/Short Nose; Anteverted nostrils/Short Nose; hypertelorism; joint hypermobility; metatarsus varus; microgNA†thia; ogival palate; shawl scrotum; short stature                           |
|                              |      |              | 48(Nep¶1 ) | 1  | Anteverted nostrils/Short Nose; Anteverted nostrils/Short Nose; hypertelorism; joint hypermobility; metatarsus varus; MicrogNA†thia; ogival palate; pectus excavatum; ptosis; shawl scrotum; short stature |
|                              |      |              | 49(Nep¶2 ) | 4  | Anteverted nostrils/Short Nose; Anteverted nostrils/Short Nose; coxa magNA†; hypertelorism; joint hypermobility; metatarsus varus; microgNA†thia; myopathy; ogival palate; shawl scrotum; short stature    |
| <b>Niida et al.[33]</b>      | 2014 | Japan        | 50         | 6  | Anteverted nostrils/Short Nose; brachydactyly/wide fingers; clinodactyly; cryptorchidism; hypertelorism; interdigital webbing; ptosis; round face; shawl scrotum                                           |

|                           |      |        |       |    |                                                                                                                                                                                                                                                                                                                                                                                                                                    |
|---------------------------|------|--------|-------|----|------------------------------------------------------------------------------------------------------------------------------------------------------------------------------------------------------------------------------------------------------------------------------------------------------------------------------------------------------------------------------------------------------------------------------------|
| Pérez-Coria et al.<br>[4] | 2015 | Mexico | 51(1) | 6  | Anteverted nostrils/Short Nose;<br>bottom lip fold;<br>brachydactyly/wide fingers;<br>clinodactyly; cryptorchidism;<br>dental malocclusion; dysplastic<br>ears; frontal bossing;<br>hypertelorism; interdigital<br>webbing; joint hypermobility;<br>long philtrum; midface<br>hypoplasia; obesity; shawl<br>scrotum; short stature; simian<br>creases; wide feet; widow's<br>peak                                                  |
|                           |      |        | 52(4) | 12 | Bottom lip fold;<br>brachydactyly/wide fingers;<br>camptodactyly; Cryptorchidism;<br>Dental malocclusion; downward<br>slant palpebral fissures;<br>dysplastic ears; hypertelorism;<br>interdigital webbing; joint<br>hypermobility; Long Philtrum;<br>Midface Hypoplasia; Obesity;<br>Psychomotor retardation;<br>ptosis; shawl scrotum; Short<br>stature; syndactyly; wide feet;<br>widow's peak                                  |
|                           |      |        | 53(5) | 4  | Anteverted nostrils/Short Nose;<br>bottom lip fold;<br>brachydactyly/wide fingers;<br>camptodactyly; clinodactyly;<br>cryptorchidism; downward slant<br>palpebral fissures; dysplastic<br>ears; hypertelorism; inguiNA†I<br>hernia; interdigital webbing;<br>joint hypermobility; long<br>philtrum; midface hypoplasia;<br>ptosis; shawl scrotum; short<br>stature; simian crease;<br>umbilical hernia; wide feet;<br>widow's peak |

|                             |      |        |          |    |                                                                                                                                                                                                                                                                                                                                        |
|-----------------------------|------|--------|----------|----|----------------------------------------------------------------------------------------------------------------------------------------------------------------------------------------------------------------------------------------------------------------------------------------------------------------------------------------|
| <b>GE et al. [20]</b>       | 2015 | China† | 54       | 2  | Blepharophimosis; Bone age retarded; Brachydactyly/wide fingers; enlarged liver; groove below upper lip; hypertelorism; inguinal hernia; low set ears; short stature; splenic cyst; swollen testicles                                                                                                                                  |
| <b>Pariltay et al. [34]</b> | 2016 | Turkey | 55       | 14 | Anteverted nostrils/Short Nose; Brachydactyly/wide fingers; broad nasal bridge; cryptorchidism; dysplastic ears; hypertelorism; large fontanelle/sutures; ogival palate; shawl scrotum; simian crease; widow's peak                                                                                                                    |
| <b>Griffin et al. [35]</b>  | 2016 | USA§   | 56(IV-1) | 1  | Ankyloglossia; Anteverted nostrils/Short Nose; astigmatism; brachydactyly/wide fingers; clinodactyly; clubbed feet; cryptorchidism; diastema; downward slant palpebral fissures; dysplastic ears; interphalangeal joint contracture; low set ears; metatarsus varus; ptosis; round face; shawl scrotum; simian creases; still's murmur |

|                       |      |      |          |   |                                                                                                                                                                                                                                                                                                                                                                                                                                                                                                                                                                       |
|-----------------------|------|------|----------|---|-----------------------------------------------------------------------------------------------------------------------------------------------------------------------------------------------------------------------------------------------------------------------------------------------------------------------------------------------------------------------------------------------------------------------------------------------------------------------------------------------------------------------------------------------------------------------|
| Hamzeh et al.<br>[36] | 2017 | UAE‡ | 57(IV-3) | 7 | ADHD;Anteverted nostrils/Short Nose; blepharophimosis; brachydactyly/wide fingers; broad NA†sal bridge; clinodactyly; Development delayed; downward slant palpebral fissures; dysplastic ears; epicanthal fold; frontal bossing; hypertelorism; interdigital webbing; Low set ears; microgNA†thia; ogival palate; pectus carina†tum; pectus excavatum; ptosis; short columella; short neck; short philtrum; Short stature; simian creases; sleep disorder; social/language skills delayed; syndactyly; thin upper lip vermillion; widely spaced nipples; widow's peak |
|                       |      |      | 58(IV-5) | 3 | ADHD; Anteverted nostrils/Short Nose;Anteverted nostrils/Short Nose; Blepharophimosis; brachydactyly/wide fingers; Broad NA†sal bridge; clinodactyly; Development delayed; downward slant palpebral fissures; dysplastic ears; epicanthal fold; Frontal bossing; hypertelorism; long uvula; Neurocognitive development delayed; overactive frontalis muscle; poor bell's phenomenon; ptosis; short philtrum; short neck; short stature; Short/Broad Hands; telecanthus; widely spaced nipples; widow's peak                                                           |

### Legend

\*NR: Not reported; †NA: Not applicable; ‡UAE: United Arab Emirates; §USA: Unite



**Log-Scott syndrome and assessment of genotype-phenotype correlation: a systematic review**  
 de Lima Oliveira, Eliene Magda de Assis, Michel Campos Ribeiro, Analina Furtado Valadão, A

List of all informations collected from each patient included

| Type of mutation                 | Splicing Mutation | Amino Acid Change | Protein |
|----------------------------------|-------------------|-------------------|---------|
| Missense/Nonsense<br>(1565G>A)   | NA†               | Arg522His         | p.R522H |
| Missense/Nonsense<br>(1565G>A)   | NA†               | Arg522His         | p.R522H |
| Gross Deletion<br>(Incl.ex.9-12) | NA†               | NA†               | NA†     |

|                                |     |           |         |
|--------------------------------|-----|-----------|---------|
| Missense/Nonsense<br>(1829G>A) | NA† | Arg610Gln | p.R610Q |
| Missense/Nonsense<br>(1829G>A) | NA† | Arg610Gln | p.R610Q |
| Missense/Nonsense<br>(1829G>A) | NA† | Arg610Gln | p.R610Q |

|                               |     |           |         |
|-------------------------------|-----|-----------|---------|
| Small Insertion<br>(528insC)  | NA† | NA†       | NA†     |
| Small Insertion<br>(528insC)  | NA† | NA†       | NA†     |
| Missense/Nonsense<br>(614G>T) | NA† | Ser205Ile | p.S205I |

|                                    |     |           |                    |
|------------------------------------|-----|-----------|--------------------|
| Small Deletion<br>(982delC)        | NA† | NA†       | p.(His328Thrfs*32) |
| Gross Deletions (944-<br>975del32) | NA† | NA†       | NA†                |
| Missense/Nonsense<br>(1193 A>C)    | NA† | Glu380Ala | p.E380A            |
| Missense/Nonsense<br>(1328 G>A)    | NA† | Arg443His | p.R443H            |

|                                    |     |           |                    |
|------------------------------------|-----|-----------|--------------------|
| Small Deletion (1316-1319del AGCT) | NA† | NA†       | NA†                |
| Small Deletion (2530delG)          | NA† | NA†       | p.(Val844Trpfs*19) |
| Missense/Nonsense (c.1223G>A)      | NA† | Arg408Gln | p.R408Q            |

|                                  |     |            |                     |
|----------------------------------|-----|------------|---------------------|
| Small Deletion<br>(c.2192delA)   | NA† | NA†        | p.(Lys731Argfs*132) |
| Small Deletion<br>(c.2192delA)   | NA† | NA†        | p.(Lys731Argfs*132) |
| Small Deletion<br>(c.2192delA)   | NA† | NA†        | p.(Lys731Argfs*132) |
|                                  |     |            |                     |
| Missense/Nonsense<br>(c.1327G>T) | NA† | Arg443Leu  | p.R443L             |
| Missense/Nonsense<br>(c.2221G>T) | NA† | Glu741Term | p.E741*             |
|                                  |     |            |                     |

|                                  |     |           |                   |
|----------------------------------|-----|-----------|-------------------|
| Missense/Nonsense<br>(c.1396A>G) | NA† | Met466Val | p.M466V           |
|                                  |     |           |                   |
| Small Insertions<br>(c.944dupC)  | NA† | NA†       | p.(Ala316Cysfs*4) |
| Small Insertions<br>(c.944dupC)  | NA† | NA†       | p.(Ala316Cysfs*4) |

|                                  |     |            |                    |
|----------------------------------|-----|------------|--------------------|
| Gross Deletions<br>(ENTIRE GENE) | NA† | NR*        | NR*                |
| Small Deletions<br>(806delC)     | NA† | NA†        | p.(Ala269Valfs*91) |
| Missense/Nonsense<br>(c.1205G>A) | NA† | Arg402Gln  | p.R402Q            |
| Missense/Nonsense<br>(c.1590T>A) | NA† | Tyr530Term | p.Y530*            |



|                                  |                 |            |                |
|----------------------------------|-----------------|------------|----------------|
| Small Deletions<br>(1620delC)    | NA†             | NA†        | Asp540Glufs*11 |
| Missense/Nonsense<br>(c.1673C>G) | NA†             | Ser558Trp  | p.S558W        |
| Splicing<br>(c.1935+3A>C)        | IVS11 ds A-C +3 | NA†        | NA†            |
| Missense/Nonsense<br>(c.1966C>T) | NA†             | Arg656Term | p.R656*        |

|                                        |     |            |           |
|----------------------------------------|-----|------------|-----------|
| Missense/Nonsense<br>(c.1966C>T)       | NA† | Arg656Term | p.R656*   |
| Missense/Nonsense<br>(c.1966C>T)       | NA† | Arg656Term | p.R656*   |
| Small Deletions<br>(2020_2020 del GAG) | NA† | NA†        | Glu676del |
| Missense/Nonsense<br>(c.2242A>G)       | NA† | Lys748Glu  | p.K748E   |

|                                    |     |           |        |
|------------------------------------|-----|-----------|--------|
| Missense/Nonsense<br>(c.175C>T)    | NA† | Gln59Term | p.Q59* |
| Missense/Nonsense<br>(c.175C>T)    | NA† | Gln59Term | p.Q59* |
| Duplication                        | NA† | NA†       | NA†    |
| Small deletions<br>(c.2016-35delA) | NA† | NA†       | NA†    |

|                                    |                |            |         |
|------------------------------------|----------------|------------|---------|
| Small deletions<br>(c.2016-35delA) | NA†            | NA†        | NA†     |
| Small deletions<br>(c.2016-35delA) | NA†            | NA†        | NA†     |
| Splicing (c.482-2A>G)              | IVS2 as A-G -2 | NA†        | NA†     |
| Missense/Nonsense<br>(c.1468C>T)   | NA†            | Gln490Term | p.Q490* |
| Missense/Nonsense<br>(c.1341G>A)   | NA†            | Trp447Term | p.W447* |

|                                  |     |            |         |
|----------------------------------|-----|------------|---------|
| Missense/Nonsense<br>(c.1341G>A) | NA† | Trp447Term | p.W447* |
| Missense/Nonsense<br>(c.1341G>A) | NA† | Trp447Term | p.W447* |
| Missense/Nonsense<br>(c.1341G>A) | NA† | Trp447Term | p.W447* |
| Missense/Nonsense<br>(c.1341G>A) | NA† | Trp447Term | p.W447* |
| Missense/Nonsense<br>(c.1340G>A) | NA† | Trp447Term | p.W447* |

|                                  |     |            |           |
|----------------------------------|-----|------------|-----------|
| Missense/Nonsense<br>(c.1138G>T) | NA† | Glu380Term | p.E380*   |
| Missense/Nonsense<br>(c.1990C>T) | NA† | Gln664Term | p.Gln664* |
| Missense/Nonsense<br>(c.1990C>T) | NA† | Gln664Term | p.Gln664* |

|                                     |                |           |         |
|-------------------------------------|----------------|-----------|---------|
| Missense/Nonsense<br>(c.1270A>G)    | NA†            | Asn424Asp | p.N424D |
| Splicing Mutations<br>(c.1340+2T>A) | IVS6 ds T-A +2 | NA†       | NA†     |
| Missense/Nonsense<br>(c.2761C>T)    | NA†            | Gly757Arg | p.G757R |

|                               |     |     |                    |
|-------------------------------|-----|-----|--------------------|
| Small Deletions<br>(c.53delC) | NA† | NA† | p.(Pro18Argfs*106) |
| Small Deletions<br>(c.53delC) | NA† | NA† | p.(Pro18Argfs*106) |

† = United States of America; ||bro: Brother; ¶nep= Nephew

---



**tematic review**  
lfredo Orrico

| Insertions/Duplications |
|-------------------------|
| NA†                     |
| NA†                     |
| NA†                     |

NA†

NA†

NA†

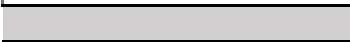

NA†

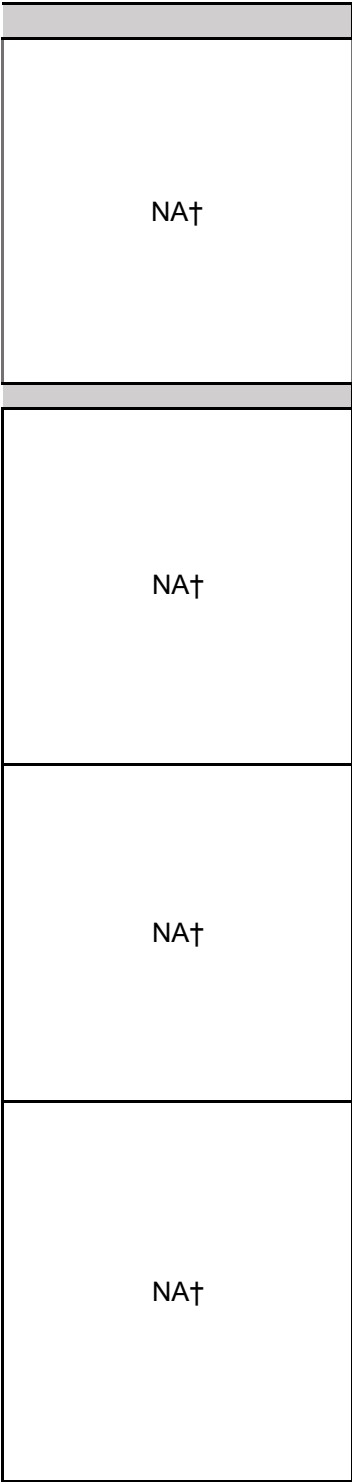



NA†

c.307+5711\_2016-227

NA†

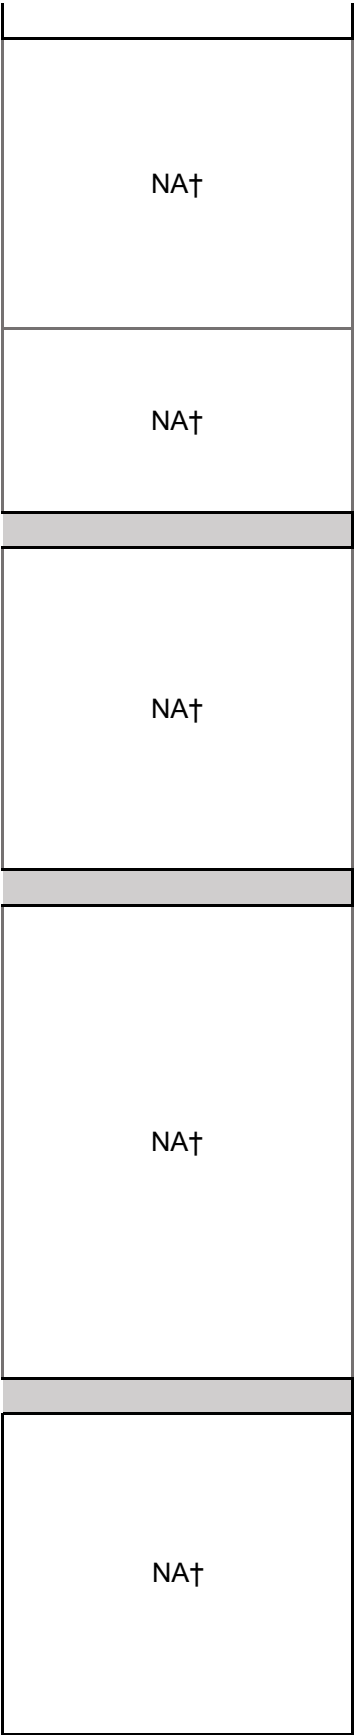

NA†

NA†

NA†

NA†

NA†

NAT

NAT

NAT

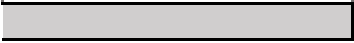

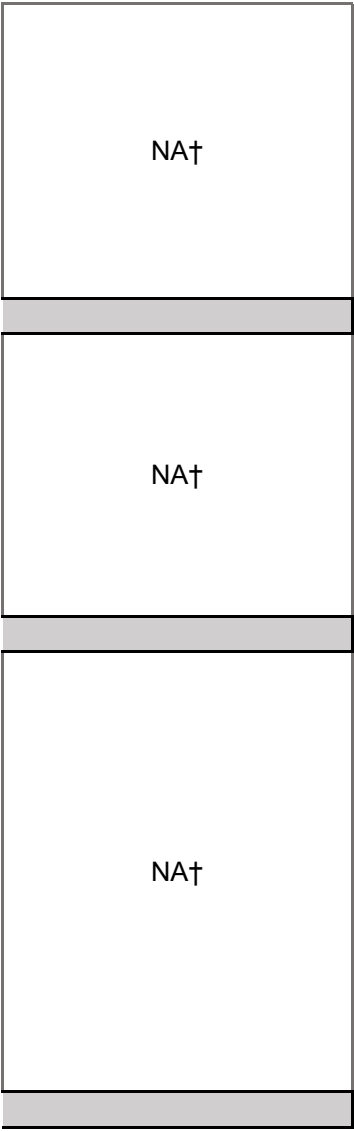

NAT

NAT
